# Supplementary material
Source: PubMed Central journal article supplement (PMC2386955)
Supplement: NIHMS42027-supplement-01.pdf [file NIHMS42027-supplement-01.pdf]

**Supplementary Material for the article “Age of Onset and Temporal Sequencing of Lifetime *DSM-IV* Alcohol Use Disorders Relative to Comorbid Mood and Anxiety Disorders” published in *Drug and Alcohol Dependence***

Daniel E. Falk<sup>1</sup>

Hsiao-ye Yi<sup>1</sup>

Michael E. Hilton<sup>2</sup>

<sup>1</sup> Alcohol Epidemiologic Data System, CSR, Incorporated, 2107 Wilson Boulevard, Suite 1000, Arlington, VA 22201-3085

<sup>2</sup> National Institute on Alcohol Abuse and Alcoholism, National Institutes of Health  
5635 Fishers Lane, MSC 9304, Bethesda, MD 20892-9304

This material supplements but does not replace the content of the peer-reviewed paper published in *Drug and Alcohol Dependence*

Correspondence:

Daniel E. Falk, Ph.D.

Alcohol Epidemiologic Data System, CSR, Incorporated, 2107 Wilson Boulevard, Suite 1000, Arlington, VA 22201-3085

Phone: (703) 312-5220; Fax: (703) 312-5230; [dfalk@csrincorporated.com](mailto:dfalk@csrincorporated.com)

**Supplementary Material Age of Onset Questions for *DSM-IV* Disorders, NESARC 2001-2002.**

| <b><i>DSM-IV</i> Disorder</b>       | <b>Age of Onset Question</b>                                                                                                                                                                                                         |
|-------------------------------------|--------------------------------------------------------------------------------------------------------------------------------------------------------------------------------------------------------------------------------------|
| <b>Alcohol Dependence</b>           | About how old were you the FIRST time SOME of these <alcohol dependence> experiences happened around the same time?                                                                                                                  |
| <b>Alcohol Abuse</b>                | About how old were you the FIRST time AT LEAST ONE of these <alcohol abuse> experiences BEGAN to happen?                                                                                                                             |
| <b>Major Depression</b>             | About how old were you the FIRST time you BEGAN (to feel sad, blue, depressed or down/not to care about things or enjoy things) for at least 2 weeks and when you also had some of the other <depressive> experiences you mentioned? |
| <b>Dysthymia</b>                    | About how old were you the FIRST time you BEGAN to have low mood that lasted for at least 2 years and you often had some of the other <dysthymic> experiences you mentioned?                                                         |
| <b>Mania/Hypomania</b>              | About how old were you the FIRST time you BEGAN to feel extremely (excited, elated or hyper/irritable or easily annoyed) for at least 1 week and when you also had some of the other <manic> experiences you just mentioned?         |
| <b>Panic/Panic with Agoraphobia</b> | About how old were you the FIRST time you BEGAN to have panic attacks along with some of the other <panic > experiences you told me about?                                                                                           |
| <b>Social Phobia</b>                | About how old were you the FIRST time you BEGAN to experience a strong fear or avoidance of any social situation?                                                                                                                    |
| <b>Specific Phobia</b>              | About how old were you the FIRST time you BEGAN to experience a strong fear or avoidance of any of these <previously mentioned> objects or situations?                                                                               |
| <b>General Anxiety Disorder</b>     | About how old were you the FIRST time you BEGAN to feel tense, nervous or worried for at least 6 months and also had some of the other <anxiety> experiences you mentioned?                                                          |
